# Supplementary material
Source: Springer Nature journal article supplement (https://mijn.bsl.nl/resource/supplementary/13047_2012_497_MOESM3_ESM.pdf/7473960)

**Type of Presentation and Conference**

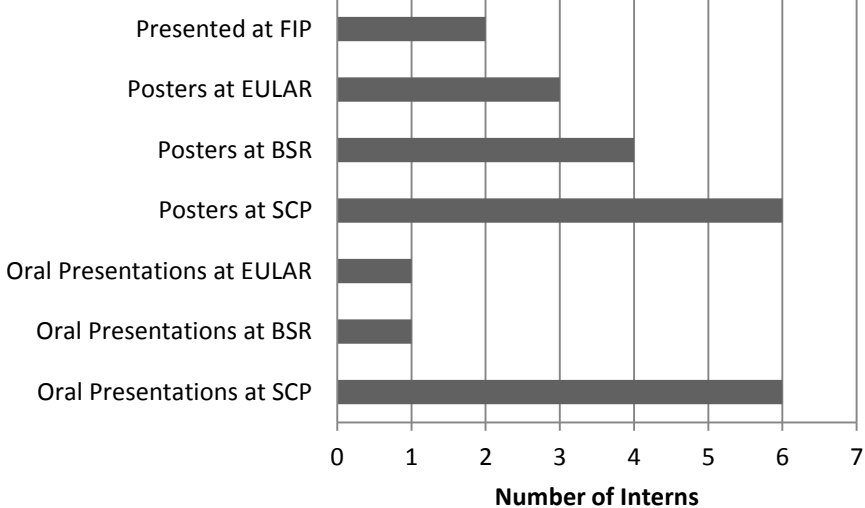

Supplement: MOESM3 [file 7473960]
